# Supplementary material for: Multifunctional reversibly sealable microfluidic devices for patterned material deposition approaches
Source: Royal Society of Chemistry journal article supplement (doi:10.1039/c4ra15785k), 2015-01-01
Supplement: c4ra15785k1.pdf [file c4ra15785k1.pdf]

**Supporting Information for RSC Advances**

**Multifunctional reversibly sealable microfluidic devices for patterned material deposition approaches**

A. Gang,<sup>a</sup> N. Hausteин,<sup>a</sup> L. Baraban<sup>a</sup> and G. Cunibert<sup>a,b</sup>

Correspondence should be addressed to

Larysa Baraban: [larysa.baraban@nano.tu-dresden.de](mailto:larysa.baraban@nano.tu-dresden.de) and

Andreas Gang: [andreas.gang@nano.tu-dresden.de](mailto:andreas.gang@nano.tu-dresden.de)

a - Institute for Materials Science and Max Bergmann Center of Biomaterials TU Dresden, 01062 Dresden, Germany

b - Center for Advancing Electronics Dresden (CfAED) TU Dresden, 01062 Dresden, Germany

## **Supporting Information**

### **Figure S1**

PDMS device fabrication in pictures – photographs on the left hand side and according schematic drawings on the right hand side. Including one fluorescence microscopy image obtained while utilizing the four-channel PDMS stamp produced during the photo series.

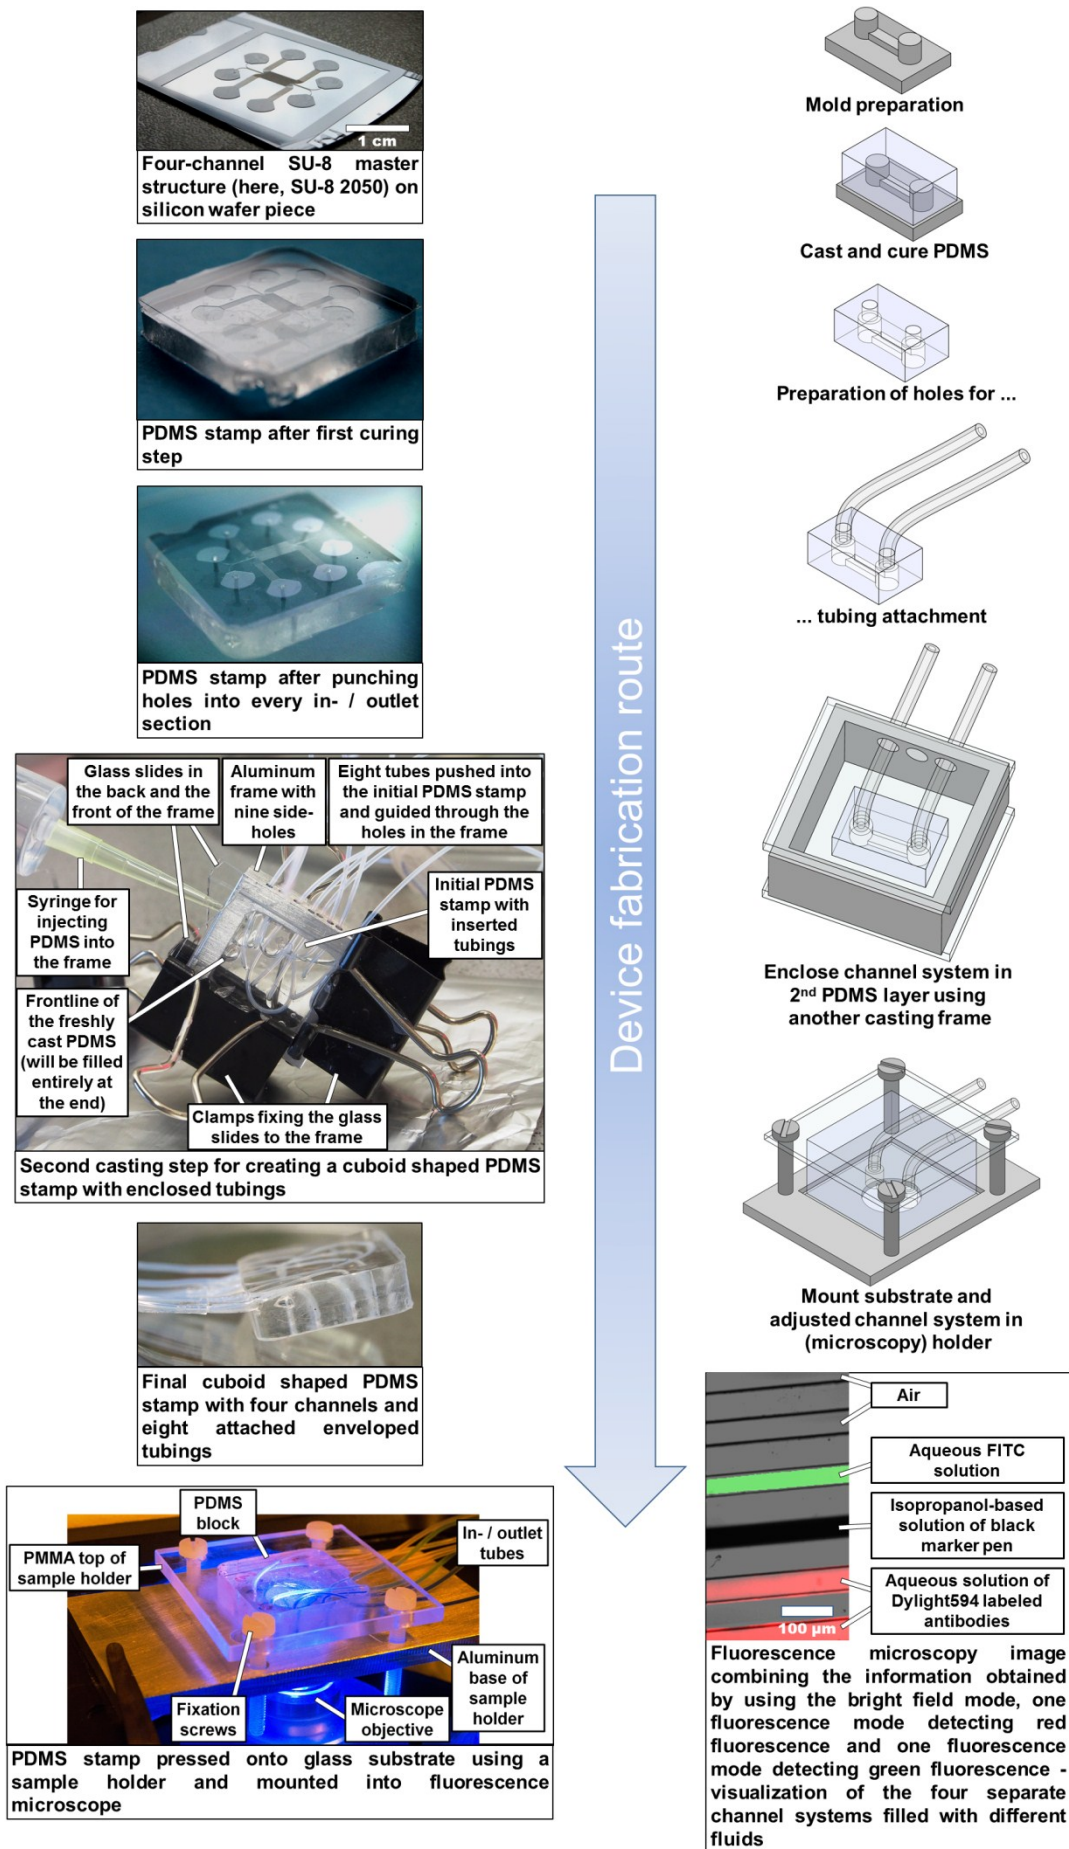

Figure S1
